# Supplementary material for: 3D-printed alginate/phenamil composite scaffolds constituted with microsized core–shell struts for hard tissue regeneration
Source: Royal Society of Chemistry journal article supplement (doi:10.1039/c5ra01479d), 2015-01-01
Supplement: c5ra01479d1.pdf [file c5ra01479d1.pdf]

(a)  $^1\text{H}$  NMR

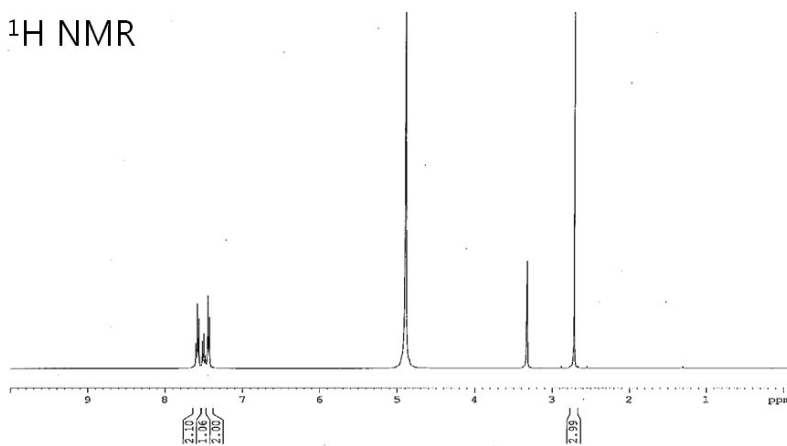

(b)  $^{13}\text{C}$  NMR

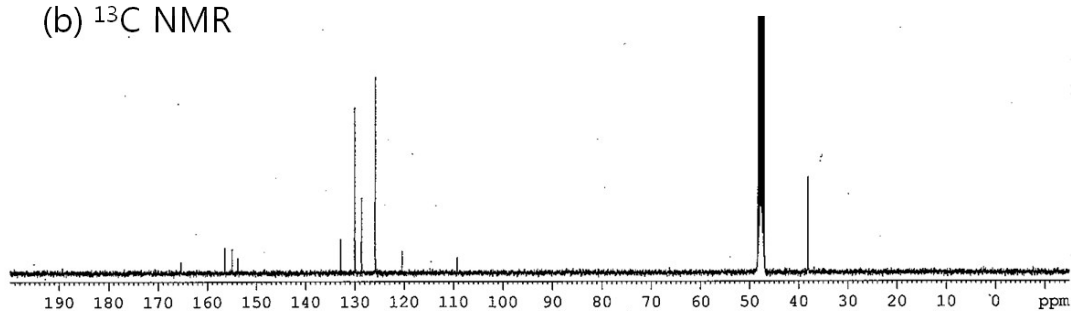

Supplemental Figure 1. NMR structures of the synthesized phenamil methanesulfonate. (a)

$^1\text{H}$  NMR spectrum of phenamil methanesulfonate. (b)  $^{13}\text{C}$  NMR spectrum of phenamil methanesulfonate.
